# Supplementary material
Source: MDPI journal article supplement (https://www.mdpi.com/2075-5309/13/4/1027)
Supplement: s1 [file s1]

**Table S1.** Results of dry shrinkage coefficients and temperature shrinkage coefficients

| Content (‰) | Length (cm) | Dry shrinkage coefficients | Temperature shrinkage coefficients |
|-------------|-------------|----------------------------|------------------------------------|
| 0           | --          | 53.08                      | 8.10                               |
| 0.1         | 1           | 52.11                      | 8.11                               |
|             | 3           | 54.20                      | 7.98                               |
|             | 5           | 51.71                      | 7.95                               |
|             | 7           | 52.69                      | 7.93                               |
|             | 9           | 51.90                      | 7.83                               |
| 0.3         | 1           | 47.03                      | 8.06                               |
|             | 3           | 45.81                      | 7.81                               |
|             | 5           | 46.30                      | 7.66                               |
|             | 7           | 43.89                      | 7.60                               |
|             | 9           | 43.01                      | 7.47                               |
| 0.5         | 1           | 41.15                      | 7.88                               |
|             | 3           | 39.11                      | 7.72                               |
|             | 5           | 38.30                      | 7.51                               |
|             | 7           | 37.86                      | 7.38                               |
|             | 9           | 36.70                      | 7.16                               |
| 0.7         | 1           | 37.99                      | 7.69                               |
|             | 3           | 34.97                      | 7.50                               |
|             | 5           | 34.00                      | 7.33                               |
|             | 7           | 33.80                      | 7.17                               |
|             | 9           | 33.50                      | 6.99                               |
| 0.9         | 1           | 35.79                      | 7.62                               |
|             | 3           | 33.40                      | 7.41                               |
|             | 5           | 32.17                      | 7.35                               |
|             | 7           | 33.61                      | 7.17                               |
|             | 9           | 34.60                      | 7.00                               |
| 1.1         | 1           | 34.09                      | 7.50                               |
|             | 3           | 33.01                      | 7.37                               |
|             | 5           | 31.50                      | 7.28                               |
|             | 7           | 31.82                      | 7.13                               |
|             | 9           | 33.08                      | 6.96                               |
